# Supplementary material for: Targeted glycoproteomic identification of cancer cell glycosylation
Source: PubMed Central journal article supplement — Glycobiology. 2009 May 11;19(8):899–909. doi: 10.1093/glycob/cwp065 (PMC2704901; doi:10.1093/glycob/cwp065), 2009-05-11
Supplement: cwp065_1.pdf [file cwp065_1.pdf]

## **Targeted glycoproteomic identification of cancer cell glycosylation**

Alex S. Powlesland, Paul G. Hitchen, Simon Parry, Sarah A. Graham, Maria Marcela Barrio, Maria Teresa Elola, José Mordoh, Anne Dell, Kurt Drickamer, and Maureen E. Taylor

Supplementary information:

Supplementary Figures 1 - 2

Supplementary Tables I - III

A. SKBR3 N-glycans

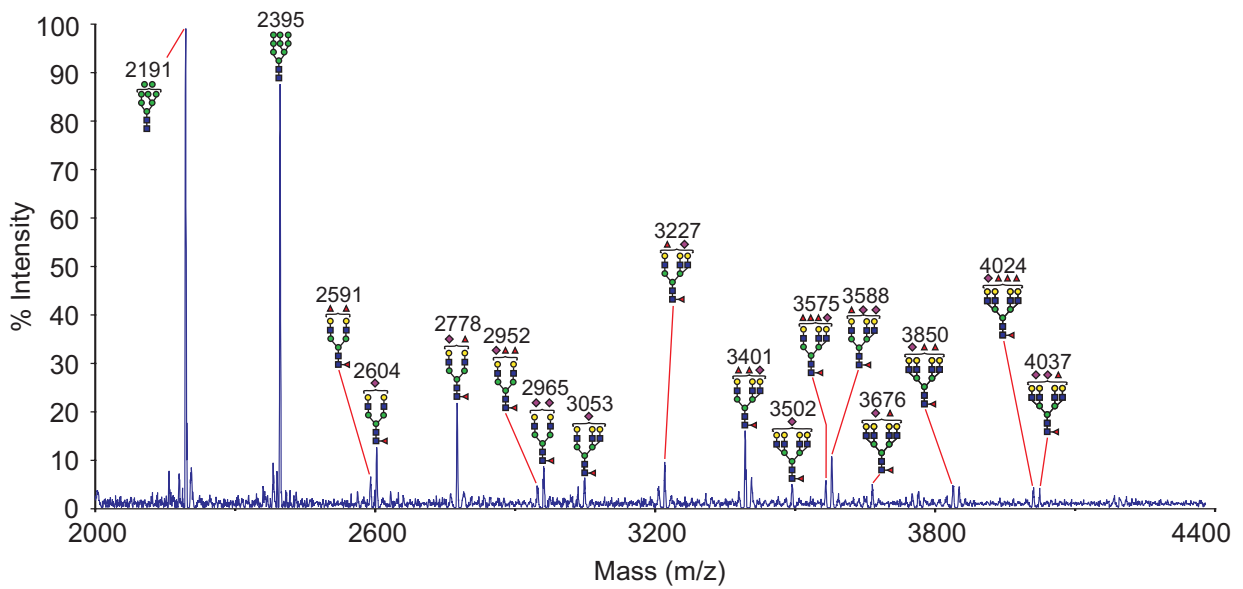

B. T47D N-glycans

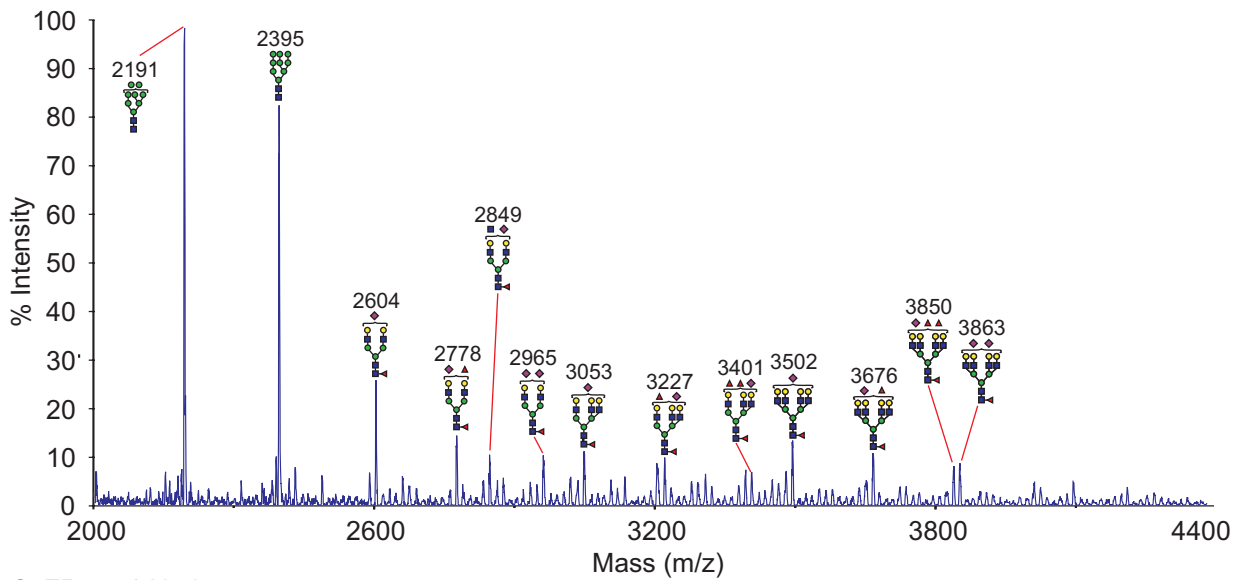

C. ZR-75-1 N-glycans

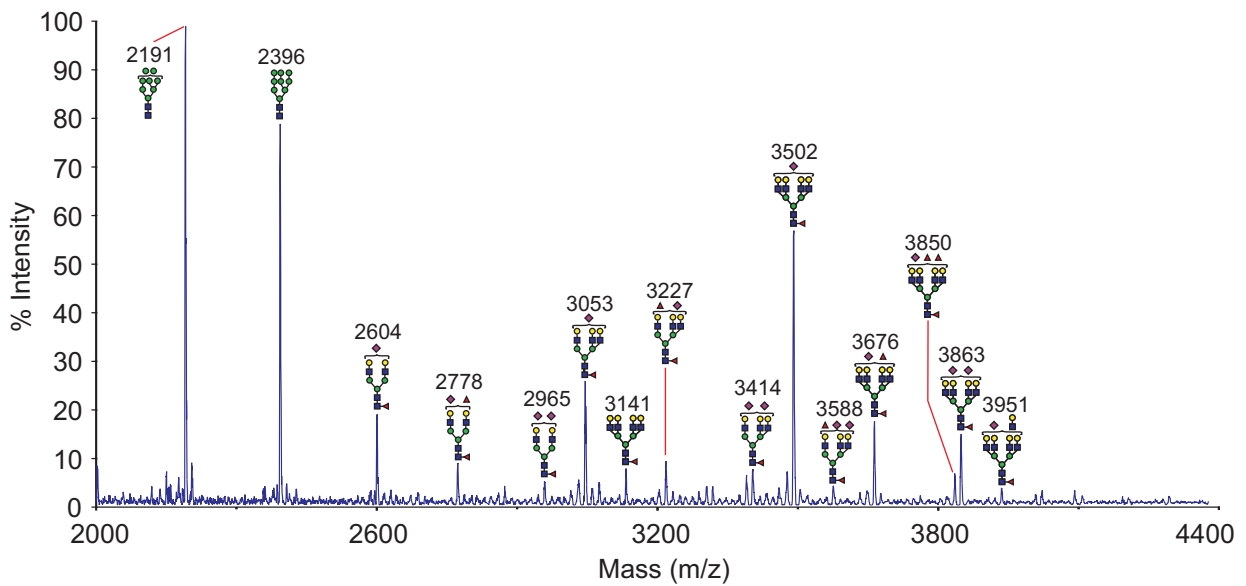

**Supplementary Figure 1.** Analysis of N-linked glycans from (A) SKBR3, (B) T47D, and (C) ZR75-1 cells. MALDI/TOF mass spectra of the major elution fractions from the Sep-Pak purifications are shown. All labeled ions were subjected to MS/MS analysis.

A. MCF7 O-glycans

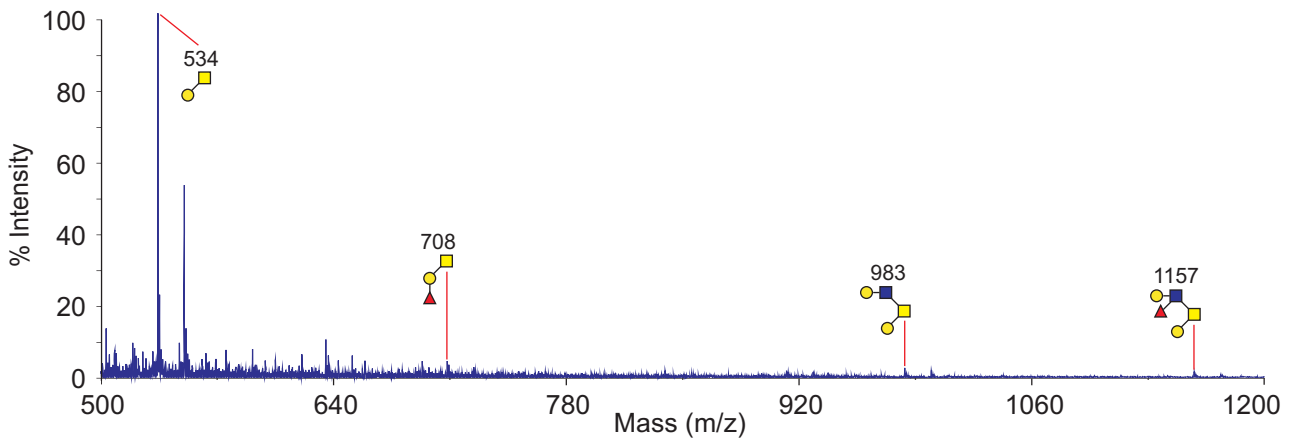

B. SKBR3 O-glycans

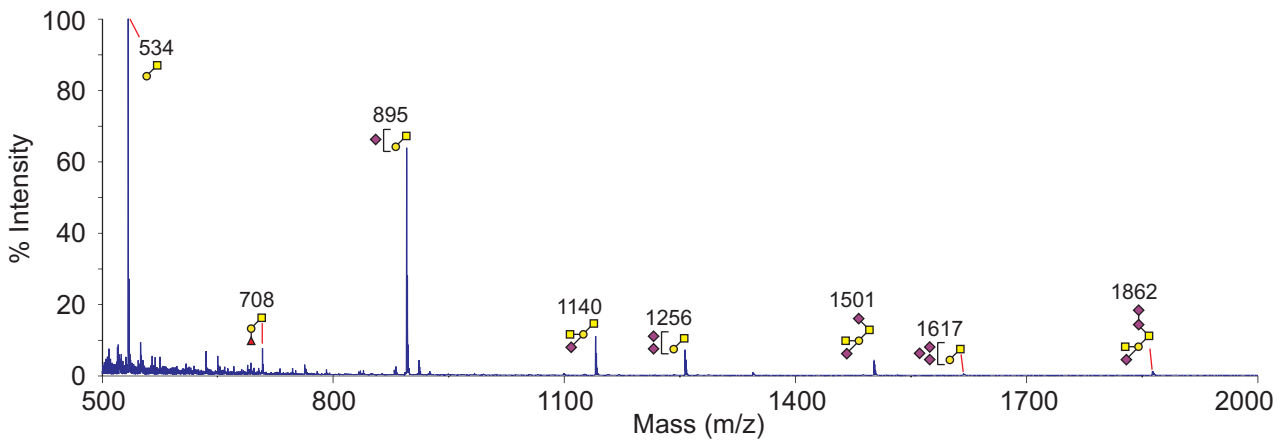

C. T47D O-glycans

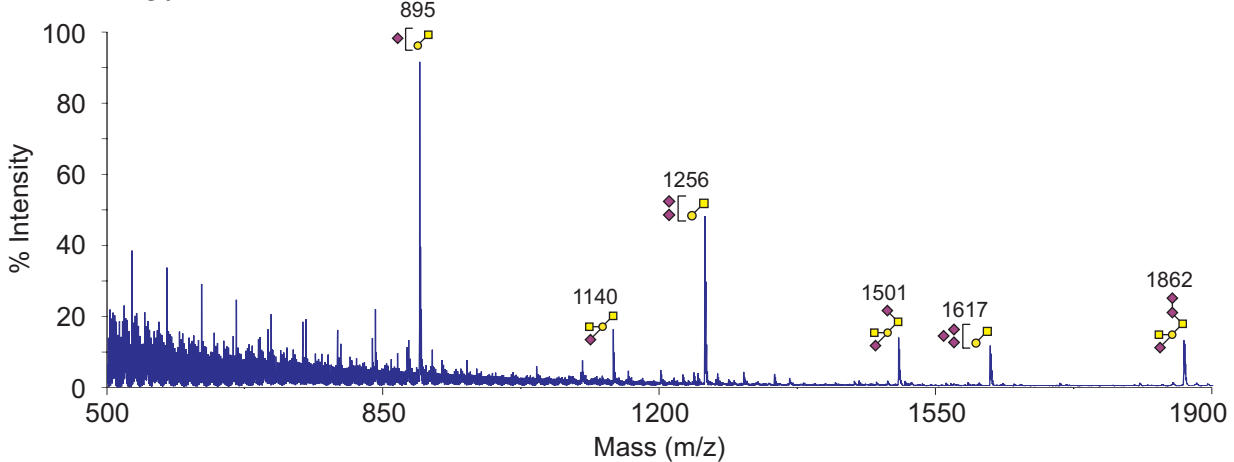

D. ZR75-1 O-glycans

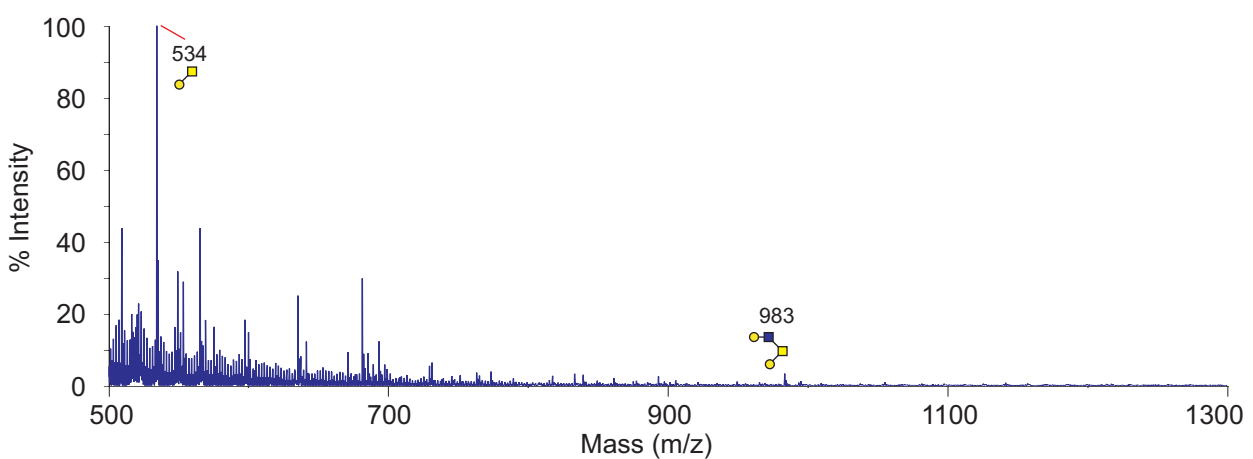

**Supplementary Figure 2.** Analysis of O-linked glycans from (A) MCF7, (B) SKBR3, (C) T47D, and (D) ZR75-1 cells. The MALDI/TOF spectra of the major elution fractions from the Sep-Pak purifications are shown.

**Supplementary Table I. Glyans on glycan array.**

| Glycan number | Glycan structure                                                                                                                                                             | Average fluorescence | Standard deviation |
|---------------|------------------------------------------------------------------------------------------------------------------------------------------------------------------------------|----------------------|--------------------|
| 7             | $\alpha$ -D-Gal-Sp8                                                                                                                                                          | 2635                 | 1443               |
| 8             | $\alpha$ -D-Glc-Sp8                                                                                                                                                          | 738                  | 378                |
| 9             | $\alpha$ -D-Man-Sp8                                                                                                                                                          | 509                  | 1151               |
| 10            | $\alpha$ -GalNAc-Sp8                                                                                                                                                         | 4595                 | 1896               |
| 11            | $\alpha$ -L-Fuc-Sp8                                                                                                                                                          | 1291                 | 582                |
| 12            | $\alpha$ -L-Fuc-Sp9                                                                                                                                                          | 1333                 | 596                |
| 13            | $\alpha$ -L-Rha-Sp8                                                                                                                                                          | 438                  | 160                |
| 14            | $\alpha$ -Neu5Ac-Sp8                                                                                                                                                         | 678                  | 335                |
| 15            | $\alpha$ -Neu5Ac-Sp11                                                                                                                                                        | 804                  | 448                |
| 16            | $\beta$ -Neu5Ac-Sp8                                                                                                                                                          | 576                  | 322                |
| 17            | $\beta$ -D-Gal-Sp8                                                                                                                                                           | 2260                 | 1475               |
| 18            | $\beta$ -D-Glc-Sp8                                                                                                                                                           | 976                  | 311                |
| 19            | $\beta$ -D-Man-Sp8                                                                                                                                                           | 425                  | 697                |
| 20            | $\beta$ -GalNAc-Sp8                                                                                                                                                          | 1043                 | 624                |
| 21            | $\beta$ -GlcNAc-Sp0                                                                                                                                                          | 514                  | 175                |
| 22            | $\beta$ -GlcNAc-Sp8                                                                                                                                                          | 383                  | 214                |
| 23            | $\beta$ -GlcN(Gc)-Sp8                                                                                                                                                        | 613                  | 317                |
| 24            | (Gal $\beta$ 1-4GlcNAc $\beta$ ) <sub>2</sub> -3,6-GalNAc $\alpha$ -Sp8                                                                                                      | 1222                 | 543                |
| 25            | GlcNAc $\beta$ 1-3(GlcNAc $\beta$ 1-4)(GlcNAc $\beta$ 1-6)GlcNAc-Sp8                                                                                                         | 375                  | 247                |
| 26            | [3OSO3][6OSO3]Gal $\beta$ 1-4[6OSO3]GlcNAc $\beta$ -Sp0                                                                                                                      | 3905                 | 524                |
| 27            | [3OSO3][6OSO3]Gal $\beta$ 1-4GlcNAc $\beta$ -Sp0                                                                                                                             | 1861                 | 1132               |
| 28            | [3OSO3]Gal $\beta$ 1-4Glc $\beta$ -Sp8                                                                                                                                       | 1822                 | 643                |
| 29            | [3OSO3]Gal $\beta$ 1-4(6OSO3)Glc $\beta$ -Sp0                                                                                                                                | 2250                 | 957                |
| 30            | [3OSO3]Gal $\beta$ 1-4(6OSO3)Glc $\beta$ -Sp8                                                                                                                                | 3185                 | 568                |
| 31            | [3OSO3]Gal $\beta$ 1-3(Fuca1-4)GlcNAc $\beta$ -Sp8                                                                                                                           | 1361                 | 404                |
| 32            | [3OSO3]Gal $\beta$ 1-3GalNAc $\alpha$ -Sp8                                                                                                                                   | 815                  | 450                |
| 33            | [3OSO3]Gal $\beta$ 1-3GlcNAc $\beta$ -Sp8                                                                                                                                    | 1511                 | 552                |
| 34            | [3OSO3]Gal $\beta$ 1-4(Fuca1-3)GlcNAc $\beta$ -Sp8                                                                                                                           | 737                  | 159                |
| 35            | [3OSO3]Gal $\beta$ 1-4[6OSO3]GlcNAc $\beta$ -Sp8                                                                                                                             | 2561                 | 938                |
| 36            | [3OSO3]Gal $\beta$ 1-4GlcNAc $\beta$ -Sp0                                                                                                                                    | 1180                 | 476                |
| 37            | [3OSO3]Gal $\beta$ 1-4GlcNAc $\beta$ -Sp8                                                                                                                                    | 974                  | 349                |
| 38            | [3OSO3]Gal $\beta$ -Sp8                                                                                                                                                      | 1705                 | 1440               |
| 39            | [4OSO3][6OSO3]Gal $\beta$ 1-4GlcNAc $\beta$ -Sp0                                                                                                                             | 1633                 | 518                |
| 40            | [4OSO3]Gal $\beta$ 1-4GlcNAc $\beta$ -Sp8                                                                                                                                    | 1351                 | 453                |
| 41            | 6-H <sub>2</sub> PO <sub>3</sub> Man $\alpha$ -Sp8                                                                                                                           | 511                  | 252                |
| 42            | [6OSO3]Gal $\beta$ 1-4Glc $\beta$ -Sp0                                                                                                                                       | 2256                 | 1217               |
| 43            | [6OSO3]Gal $\beta$ 1-4Glc $\beta$ -Sp8                                                                                                                                       | 2742                 | 1060               |
| 44            | [6OSO3]Gal $\beta$ 1-4GlcNAc $\beta$ -Sp8                                                                                                                                    | 2604                 | 1243               |
| 45            | [6OSO3]Gal $\beta$ 1-4[6OSO3]Glc $\beta$ -Sp8                                                                                                                                | 7262                 | 2333               |
| 46            | NeuAca2-3[6OSO3]Gal $\beta$ 1-4GlcNAc $\beta$ -Sp8                                                                                                                           | 694                  | 427                |
| 47            | [6OSO3]GlcNAc $\beta$ -Sp8                                                                                                                                                   | 2103                 | 690                |
| 48            | 9-O-AcNeu5NAc $\alpha$ -Sp8                                                                                                                                                  | 489                  | 183                |
| 49            | 9-O-AcNeu5NAc $\alpha$ 2-6Gal $\beta$ 1-4GlcNAc $\beta$ -Sp8                                                                                                                 | 597                  | 198                |
| 50            | Man $\alpha$ 1-3(Man $\alpha$ 1-6)Man $\beta$ 1-4GlcNAc $\beta$ 1-4GlcNAc $\beta$ -Gly                                                                                       | 738                  | 543                |
| 51            | GlcNAc $\beta$ 1-2Man $\alpha$ 1-3(GlcNAc $\beta$ 1-2Man $\alpha$ 1-6)Man $\beta$ 1-4GlcNAc $\beta$ 1-4GlcNAc $\beta$ -Gly                                                   | 564                  | 147                |
| 52            | Gal $\beta$ 1-4GlcNAc $\beta$ 1-2Man $\alpha$ 1-3(Gal $\beta$ 1-4GlcNAc $\beta$ 1-2Man $\alpha$ 1-6)Man $\beta$ 1-4GlcNAc $\beta$ 1-4GlcNAc $\beta$ -Gly                     | 2076                 | 459                |
| 53            | Neu5Aca2-6Gal $\beta$ 1-4GlcNAc $\beta$ 1-2Man $\alpha$ 1-3(Neu5Aca2-6Gal $\beta$ 1-4GlcNAc $\beta$ 1-2Man $\alpha$ 1-6)Man $\beta$ 1-4GlcNAc $\beta$ 1-4GlcNAc $\beta$ -Gly | 1263                 | 780                |
| 54            | Neu5Aca2-6Gal $\beta$ 1-4GlcNAc $\beta$ 1-2Man $\alpha$ 1-3(Neu5Aca2-6Gal $\beta$ 1-4GlcNAc $\beta$ 1-2Man $\alpha$ 1-6)Man $\beta$ 1-4GlcNAc $\beta$ 1-4GlcNAc $\beta$ -Sp8 | 1355                 | 591                |
| 55            | Fuca1-2Gal $\beta$ 1-3GalNAc $\beta$ 1-3Gal $\alpha$ -Sp9                                                                                                                    | 636                  | 164                |
| 56            | Fuca1-2Gal $\beta$ 1-3GalNAc $\beta$ 1-3Gal $\alpha$ 1-4Gal $\beta$ 1-4Glc $\beta$ -Sp9                                                                                      | 704                  | 246                |
| 57            | Fuca1-2Gal $\beta$ 1-3(Fuca1-4)GlcNAc $\beta$ -Sp8                                                                                                                           | 307                  | 178                |
| 58            | Fuca1-2Gal $\beta$ 1-3GalNAc $\alpha$ -Sp8                                                                                                                                   | 867                  | 661                |
| 59            | Fuca1-2Gal $\beta$ 1-3GalNAc $\beta$ 1-4(Neu5Aca2-3)Gal $\beta$ 1-4Glc $\beta$ -Sp0                                                                                          | 847                  | 273                |
| 60            | Fuca1-2Gal $\beta$ 1-3GalNAc $\beta$ 1-4(Neu5Aca2-3)Gal $\beta$ 1-4Glc $\beta$ -Sp9                                                                                          | 1289                 | 370                |
| 61            | Fuca1-2Gal $\beta$ 1-3GlcNAc $\beta$ 1-3Gal $\beta$ 1-4Glc $\beta$ -Sp10                                                                                                     | 370                  | 267                |
| 62            | Fuca1-2Gal $\beta$ 1-3GlcNAc $\beta$ 1-3Gal $\beta$ 1-4Glc $\beta$ -Sp8                                                                                                      | 404                  | 300                |
| 63            | Fuca1-2Gal $\beta$ 1-3GlcNAc $\beta$ -Sp0                                                                                                                                    | 424                  | 248                |
| 64            | Fuca1-2Gal $\beta$ 1-3GlcNAc $\beta$ -Sp8                                                                                                                                    | 211                  | 106                |
| 65            | Fuca1-2Gal $\beta$ 1-4(Fuca1-3)GlcNAc $\beta$ 1-3Gal $\beta$ 1-4(Fuca1-3)GlcNAc $\beta$ -Sp0                                                                                 | 444                  | 61                 |
| 66            | Fuca1-2Gal $\beta$ 1-4(Fuca1-3)GlcNAc $\beta$ 1-3Gal $\beta$ 1-4(Fuca1-3)GlcNAc $\beta$ 1-3Gal $\beta$ 1-4(Fuca1-3)GlcNAc $\beta$ -Sp0                                       | 607                  | 371                |

|     |                                                             |       |       |
|-----|-------------------------------------------------------------|-------|-------|
| 67  | Fuca1-2Galβ1-4(Fuca1-3)GlcNAcβ-Sp0                          | 389   | 243   |
| 68  | Fuca1-2Galβ1-4(Fuca1-3)GlcNAcβ-Sp8                          | 383   | 152   |
| 69  | Fuca1-2Galβ1-4GlcNAcβ1-3Galβ1-4GlcNAc-Sp0                   | 450   | 283   |
| 70  | Fuca1-2Galβ1-4GlcNAcβ1-3Galβ1-4GlcNAcβ1-3Galβ1-4GlcNAcβ-Sp0 | 546   | 187   |
| 71  | Fuca1-2Galβ1-4GlcNAcβ-Sp0                                   | 449   | 332   |
| 72  | Fuca1-2Galβ1-4GlcNAcβ-Sp8                                   | 339   | 150   |
| 73  | Fuca1-2Galβ1-4Glcβ-Sp0                                      | 282   | 97    |
| 74  | Fuca1-2Galβ-Sp8                                             | 1707  | 575   |
| 75  | Fuca1-3GlcNAcβ-Sp8                                          | 642   | 633   |
| 76  | Fuca1-3GlcNAcβ-Sp8                                          | 416   | 271   |
| 77  | Fuca1-4GlcNAcβ-Sp8                                          | 397   | 238   |
| 78  | Fucβ1-3GlcNAcβ-Sp8                                          | 814   | 1172  |
| 79  | GalNAca1-3(Fuca1-2)Galβ1-3GlcNAcβ-Sp0                       | 542   | 346   |
| 80  | GalNAca1-3(Fuca1-2)Galβ1-4(Fuca1-3)GlcNAcβ-Sp0              | 443   | 150   |
| 81  | GalNAca1-3(Fuca1-2)Galβ1-4GlcNAcβ-Sp0                       | 426   | 164   |
| 82  | GalNAca1-3(Fuca1-2)Galβ1-4GlcNAcβ-Sp8                       | 398   | 128   |
| 83  | GalNAca1-3(Fuca1-2)Galβ1-4Glcβ-Sp0                          | 715   | 463   |
| 84  | GalNAca1-3(Fuca1-2)Galβ-Sp8                                 | 6005  | 14001 |
| 85  | GalNAca1-3GalNAcβ-Sp8                                       | 331   | 161   |
| 86  | GalNAca1-3Galβ-Sp8                                          | 695   | 380   |
| 87  | GalNAca1-4(Fuca1-2)Galβ1-4GlcNAcβ-Sp8                       | 459   | 142   |
| 88  | GalNAcβ1-3GalNAca-Sp8                                       | 228   | 123   |
| 89  | GalNAcβ1-3(Fuca1-2)Galβ-Sp8                                 | 4340  | 1928  |
| 90  | GalNAcβ1-3Galα1-4Galβ1-4GlcNAcβ-Sp0                         | 1745  | 475   |
| 91  | GalNAcβ1-4(Fuca1-3)GlcNAcβ-Sp0                              | 339   | 250   |
| 92  | GalNAcβ1-4GlcNAcβ-Sp0                                       | 669   | 265   |
| 93  | GalNAcβ1-4GlcNAcβ-Sp8                                       | 470   | 148   |
| 94  | Galα1-2Galβ-Sp8                                             | 459   | 217   |
| 95  | Galα1-3(Fuca1-2)Galβ1-3GlcNAcβ-Sp0                          | 357   | 244   |
| 96  | Galα1-3(Fuca1-2)Galβ1-4(Fuca1-3)GlcNAcβ-Sp0                 | 340   | 197   |
| 97  | Galα1-3(Fuca1-2)Galβ1-4GlcNAc-Sp0                           | 300   | 89    |
| 98  | Galα1-3(Fuca1-2)Galβ1-4Glcβ-Sp0                             | 331   | 166   |
| 99  | Galα1-3(Fuca1-2)Galβ-Sp8                                    | 400   | 167   |
| 100 | Galα1-3(Galα1-4)Galβ1-4GlcNAcβ-Sp8                          | 4983  | 2540  |
| 101 | Galα1-3GalNAca-Sp8                                          | 510   | 66    |
| 102 | Galα1-3GalNAcβ-Sp8                                          | 258   | 191   |
| 103 | Galα1-3Galβ1-4(Fuca1-3)GlcNAcβ-Sp8                          | 413   | 194   |
| 104 | Galα1-3Galβ1-3GlcNAcβ-Sp0                                   | 525   | 398   |
| 105 | Galα1-3Galβ1-4GlcNAcβ-Sp8                                   | 879   | 175   |
| 106 | Galα1-3Galβ1-4Glcβ-Sp0                                      | 363   | 229   |
| 107 | Galα1-3Galβ-Sp8                                             | 608   | 342   |
| 108 | Galα1-4(Fuca1-2)Galβ1-4GlcNAcβ-Sp8                          | 573   | 141   |
| 109 | Galα1-4Galβ1-4GlcNAcβ-Sp0                                   | 1173  | 353   |
| 110 | Galα1-4Galβ1-4GlcNAcβ-Sp8                                   | 1760  | 1164  |
| 111 | Galα1-4Galβ1-4Glcβ-Sp0                                      | 1004  | 494   |
| 112 | Galα1-4GlcNAcβ-Sp8                                          | 2245  | 462   |
| 113 | Galα1-6Glcβ-Sp8                                             | 1012  | 442   |
| 114 | Galβ1-2Galβ-Sp8                                             | 624   | 493   |
| 115 | Galβ1-3(Fuca1-4)GlcNAcβ1-3Galβ1-4(Fuca1-3)GlcNAcβ-Sp0       | 27645 | 3827  |
| 116 | Galβ1-3(Fuca1-4)GlcNAcβ1-3Galβ1-4GlcNAcβ-Sp0                | 2362  | 413   |
| 117 | Galβ1-3(Fuca1-4)GlcNAc-Sp0                                  | 11544 | 3156  |
| 118 | Galβ1-3(Fuca1-4)GlcNAc-Sp8                                  | 25937 | 4145  |
| 119 | Galβ1-3(Fuca1-4)GlcNAcβ-Sp8                                 | 13755 | 11332 |
| 120 | Galβ1-3(Galβ1-4GlcNAcβ1-6)GalNAca-Sp8                       | 16480 | 6923  |
| 121 | Galβ1-3(GlcNAcβ1-6)GalNAca-Sp8                              | 3983  | 818   |
| 122 | Galβ1-3(Neu5Acα2-6)GalNAca-Sp8                              | 4411  | 2011  |
| 123 | Galβ1-3(Neu5Acβ2-6)GalNAca-Sp8                              | 5998  | 3514  |
| 124 | Galβ1-3(Neu5Acα2-6)GlcNAcβ1-4Galβ1-4Glcβ-Sp10               | 1480  | 342   |
| 125 | Galβ1-3GalNAca-Sp8                                          | 6720  | 3221  |
| 126 | Galβ1-3GalNAcβ-Sp8                                          | 14254 | 3225  |
| 127 | Galβ1-3GalNAcβ1-3Galα1-4Galβ1-4Glcβ-Sp0                     | 27047 | 8778  |
| 128 | Galβ1-3GalNAcβ1-4(Neu5Acα2-3)Galβ1-4Glcβ-Sp0                | 22770 | 3463  |
| 129 | Galβ1-3GalNAcβ1-4Galβ1-4Glcβ-Sp8                            | 20665 | 12510 |
| 130 | Galβ1-3Galβ-Sp8                                             | 3457  | 1537  |
| 131 | Galβ1-3GlcNAcβ1-3Galβ1-4GlcNAcβ-Sp0                         | 723   | 310   |
| 132 | Galβ1-3GlcNAcβ1-3Galβ1-4Glcβ-Sp10                           | 1439  | 252   |
| 133 | Galβ1-3GlcNAcβ-Sp0                                          | 1270  | 830   |

|     |                                                                                        |       |      |
|-----|----------------------------------------------------------------------------------------|-------|------|
| 134 | Galβ1-3GlcNAcβ-Sp8                                                                     | 1900  | 277  |
| 135 | Galβ1-4(Fuca1-3)GlcNAcβ-Sp0                                                            | 11018 | 3525 |
| 136 | Galβ1-4(Fuca1-3)GlcNAcβ-Sp8                                                            | 17675 | 2294 |
| 137 | Galβ1-4(Fuca1-3)GlcNAcβ1-4Galβ1-4(Fuca1-3)GlcNAcβ-Sp0                                  | 10200 | 1390 |
| 138 | Galβ1-4(Fuca1-3)GlcNAcβ1-4Galβ1-4(Fuca1-3)GlcNAcβ1-4Galβ1-4(Fuca1-3)GlcNAcβ-Sp0        | 47546 | 5464 |
| 139 | Galβ1-4[6OSO3]Glcβ-Sp0                                                                 | 3820  | 1199 |
| 140 | Galβ1-4[6OSO3]Glcβ-Sp8                                                                 | 8256  | 2780 |
| 141 | Galβ1-4GalNAca1-3(Fuca1-2)Galβ1-4GlcNAcβ-Sp8                                           | 35253 | 5429 |
| 142 | Galβ1-4GalNAcβ1-3(Fuca1-2)Galβ1-4GlcNAcβ-Sp8                                           | 38753 | 5948 |
| 143 | Galβ1-4GlcNAcβ1-3(Galβ1-4GlcNAcβ1-6)GalNAca-Sp8                                        | 1883  | 225  |
| 144 | Galβ1-4GlcNAcβ1-3GalNAca-Sp8                                                           | 603   | 530  |
| 145 | Galβ1-4GlcNAcβ1-3Galβ1-4(Fuca1-3)GlcNAcβ1-3Galβ1-4(Fuca1-3)GlcNAcβ-Sp0                 | 2284  | 384  |
| 146 | Galβ1-4GlcNAcβ1-3Galβ1-4GlcNAcβ1-3Galβ1-4GlcNAcβ-Sp0                                   | 430   | 178  |
| 147 | Galβ1-4GlcNAcβ1-3Galβ1-4GlcNAcβ-Sp0                                                    | 2497  | 970  |
| 148 | Galβ1-4GlcNAcβ1-3Galβ1-4Glcβ-Sp0                                                       | 933   | 468  |
| 149 | Galβ1-4GlcNAcβ1-3Galβ1-4Glcβ-Sp8                                                       | 1820  | 787  |
| 150 | Galβ1-4GlcNAcβ1-6(Galβ1-3)GalNAca-Sp8                                                  | 7136  | 5663 |
| 151 | Galβ1-4GlcNAcβ1-6GalNAca-Sp8                                                           | 22993 | 5394 |
| 152 | Galβ1-4GlcNAcβ-Sp0                                                                     | 757   | 482  |
| 153 | Galβ1-4GlcNAcβ-Sp8                                                                     | 644   | 396  |
| 154 | Galβ1-4Glcβ-Sp0                                                                        | 938   | 557  |
| 155 | Galβ1-4Glcβ-Sp8                                                                        | 2556  | 4729 |
| 156 | GlcNAca1-3Galβ1-4GlcNAcβ-Sp8                                                           | 311   | 286  |
| 157 | GlcNAca1-6Galβ1-4GlcNAcβ-Sp8                                                           | 16641 | 2363 |
| 158 | GlcNAcβ1-2Galβ1-3GalNAca-Sp8                                                           | 230   | 305  |
| 159 | GlcNAcβ1-3(GlcNAcβ1-6)GalNAca-Sp8                                                      | 285   | 237  |
| 160 | GlcNAcβ1-3(GlcNAcβ1-6)Galβ1-4GlcNAcβ-Sp8                                               | 738   | 481  |
| 161 | GlcNAcβ1-3GalNAca-Sp8                                                                  | 189   | 143  |
| 162 | GlcNAcβ1-3Galβ-Sp8                                                                     | 336   | 181  |
| 163 | GlcNAcβ1-3Galβ1-3GalNAca-Sp8                                                           | 298   | 118  |
| 164 | GlcNAcβ1-3Galβ1-4GlcNAcβ-Sp0                                                           | 327   | 157  |
| 165 | GlcNAcβ1-3Galβ1-4GlcNAcβ-Sp8                                                           | 302   | 134  |
| 166 | GlcNAcβ1-3Galβ1-4GlcNAcβ1-3Galβ1-4GlcNAcβ-Sp0                                          | 551   | 259  |
| 167 | GlcNAcβ1-3Galβ1-4Glcβ-Sp0                                                              | 305   | 181  |
| 168 | GlcNAcβ1-4MDPLys                                                                       | 304   | 175  |
| 169 | GlcNAcβ1-4(GlcNAcβ1-6)GalNAca-Sp8                                                      | 203   | 117  |
| 170 | GlcNAcβ1-4Galβ1-4GlcNAcβ-Sp8                                                           | 573   | 510  |
| 171 | (GlcNAcβ1-4)6β-Sp8                                                                     | 640   | 390  |
| 172 | (GlcNAcβ1-4)5β-Sp8                                                                     | 997   | 374  |
| 173 | GlcNAcβ1-4GlcNAcβ1-4GlcNAcβ-Sp8                                                        | 2040  | 552  |
| 174 | GlcNAcβ1-6(Galβ1-3)GalNAca-Sp8                                                         | 2459  | 2410 |
| 175 | GlcNAcβ1-6GalNAca-Sp8                                                                  | 2300  | 761  |
| 176 | GlcNAcβ1-6Galβ1-4GlcNAcβ-Sp8                                                           | 941   | 272  |
| 177 | Glcα1-4Glcβ-Sp8                                                                        | 175   | 92   |
| 178 | Glcα1-4Glcα-Sp8                                                                        | 519   | 387  |
| 179 | Glcα1-6Glcα1-6Glcβ-Sp8                                                                 | 549   | 699  |
| 180 | Glcβ1-4Glcβ-Sp8                                                                        | 300   | 172  |
| 181 | Glcβ1-6Glcβ-Sp8                                                                        | 348   | 286  |
| 182 | Sorbitol-Sp8                                                                           | 564   | 355  |
| 183 | GlcAα-Sp8                                                                              | 626   | 386  |
| 184 | GlcAβ-Sp8                                                                              | 384   | 263  |
| 185 | GlcAβ1-3Galβ-Sp8                                                                       | 614   | 462  |
| 186 | GlcAβ1-6Galβ-Sp8                                                                       | 3500  | 2173 |
| 187 | KDNα2-3Galβ1-3GlcNAcβ-Sp0                                                              | 340   | 296  |
| 188 | KDNα2-3Galβ1-4GlcNAcβ-Sp0                                                              | 451   | 215  |
| 189 | Mana1-2Mana1-2Mana1-3Mana-Sp9                                                          | 524   | 94   |
| 190 | Mana1-2Mana1-3(Mana1-2Mana1-6)Mana-Sp9                                                 | 295   | 56   |
| 191 | Mana1-2Mana1-3Mana-Sp9                                                                 | 456   | 288  |
| 192 | Mana1-6(Mana1-2Mana1-3)Mana1-6(Mana2Mana1-3)Manβ1-4GlcNAcβ1-4GlcNAcβ-N                 | 298   | 188  |
| 193 | Mana1-2Mana1-6(Mana1-3)Mana1-6(Mana2Mana2Mana1-3)Manβ1-4GlcNAcβ1-4GlcNAcβ-N            | 432   | 269  |
| 194 | Mana1-2Mana1-2Mana1-3(Mana1-2Mana1-3(Mana1-2Mana1-6)Mana1-6)Manβ1-4GlcNAcβ1-4GlcNAcβ-N | 381   | 400  |
| 195 | Mana1-3(Mana1-6)Mana-Sp9                                                               | 503   | 311  |
| 196 | Mana1-3(Mana1-2Mana1-2Mana1-6)Mana-Sp9                                                 | 481   | 192  |
| 197 | Mana1-6(Mana1-3)Mana1-6(Mana2Mana1-3)Manβ1-4GlcNAcβ1-4GlcNAcβ-N                        | 466   | 133  |
| 198 | Mana1-6(Mana1-3)Mana1-6(Mana1-3)Manβ1-4GlcNAcβ1-4 GlcNAcβ-N                            | 894   | 742  |
| 199 | Man5_9mix N                                                                            | 634   | 414  |
| 200 | Manβ1-4GlcNAcβ-Sp0                                                                     | 288   | 222  |

|     |                                                                                           |       |      |
|-----|-------------------------------------------------------------------------------------------|-------|------|
| 201 | Neu5Aca2-3(Galβ1-3GalNAcβ1-4)Galβ1-4Glcβ-Sp0                                              | 29741 | 6517 |
| 202 | Neu5Aca2-3Galβ1-3GalNAcα-Sp8                                                              | 457   | 277  |
| 203 | NeuAca2-8NeuAca2-8NeuAca2-8NeuAca2-3(GalNAcβ1-4)Galβ1-4Glcβ-Sp0                           | 846   | 402  |
| 204 | Neu5Aca2-8Neu5Aca2-8Neu5Aca2-3(GalNAcβ1-4)Galβ1-4Glcβ-Sp0                                 | 1292  | 512  |
| 205 | Neu5Aca2-8Neu5Aca2-8Neu5Aca2-3Galβ1-4Glcβ-Sp0                                             | 454   | 262  |
| 206 | Neu5Aca2-8Neu5Aca2-3(GalNAcβ1-4)Galβ1-4Glcβ-Sp0                                           | 3261  | 4473 |
| 207 | Neu5Aca2-8Neu5Aca2-8Neu5Aca-Sp8                                                           | 222   | 126  |
| 208 | Neu5Aca2-3(6-O-Su)Galβ1-4(Fuca1-3)GlcNAcβ-Sp8                                             | 479   | 384  |
| 209 | Neu5Aca2-3(GalNAcβ1-4)Galβ1-4GlcNAcβ-Sp0                                                  | 612   | 270  |
| 210 | Neu5Aca2-3(GalNAcβ1-4)Galβ1-4GlcNAcβ-Sp8                                                  | 404   | 156  |
| 211 | Neu5Aca2-3(GalNAcβ1-4)Galβ1-4Glcβ-Sp0                                                     | 757   | 272  |
| 212 | NeuAca2-3(NeuAca2-3Galβ1-3GalNAcβ1-4)Galβ1-4Glcβ-Sp0                                      | 412   | 141  |
| 213 | Neu5Aca2-3(Neu5Aca2-6)GalNAcα-Sp8                                                         | 419   | 222  |
| 214 | Neu5Aca2-3GalNAcα-Sp8                                                                     | 481   | 281  |
| 215 | Neu5Aca2-3GalNAcβ1-4GlcNAcβ-Sp0                                                           | 510   | 469  |
| 216 | Neu5Aca2-3Galβ1-3(6OSO3)GlcNAc-Sp8                                                        | 464   | 601  |
| 217 | Neu5Aca2-3Galβ1-3(Fuca1-4)GlcNAcβ-Sp8                                                     | 450   | 428  |
| 218 | NeuAca2-3Galβ1-3(Fuca1-4)GlcNAcβ1-3Galβ1-4(Fuca1-3)GlcNAcβ Sp0                            | 725   | 305  |
| 219 | Neu5Aca2-3Galβ1-3(Neu5Aca2-3Galβ1-4)GlcNAcβ-Sp8                                           | 507   | 221  |
| 220 | Neu5Aca2-3Galβ1-3[6OSO3]GalNAcα-Sp8                                                       | 1075  | 736  |
| 221 | Neu5Aca2-3Galβ1-3(Neu5Aca2-6)GalNAcα-Sp8                                                  | 444   | 215  |
| 222 | Neu5Aca2-3Galβ-Sp8                                                                        | 797   | 501  |
| 223 | NeuAca2-3Galβ1-3GalNAcβ1-3Galα1-4Galβ1-4Glcβ-Sp0                                          | 411   | 371  |
| 224 | NeuAca2-3Galβ1-3GlcNAcβ1-3Galβ1-4GlcNAcβ-Sp0                                              | 529   | 220  |
| 225 | Neu5Aca2-3Galβ1-3GlcNAcβ-Sp0                                                              | 406   | 239  |
| 226 | Neu5Aca2-3Galβ1-3GlcNAcβ-Sp8                                                              | 344   | 147  |
| 227 | Neu5Aca2-3Galβ1-4[6OSO3]GlcNAcβ-Sp8                                                       | 828   | 630  |
| 228 | Neu5Aca2-3Galβ1-4(Fuca1-3)(6OSO3)GlcNAcβ-Sp8                                              | 1394  | 329  |
| 229 | Neu5Aca2-3Galβ1-4(Fuca1-3)GlcNAcβ1-3Galβ1-4(Fuca1-3)GlcNAcβ1-3Galβ1-4(Fuca1-3)GlcNAcβ-Sp0 | 790   | 425  |
| 230 | Neu5Aca2-3Galβ1-4(Fuca1-3)GlcNAcβ-Sp0                                                     | 713   | 520  |
| 231 | Neu5Aca2-3Galβ1-4(Fuca1-3)GlcNAcβ-Sp8                                                     | 456   | 280  |
| 232 | Neu5Aca2-3Galβ1-4(Fuca1-3)GlcNAcβ1-3Galβ-Sp8                                              | 380   | 271  |
| 233 | Neu5Aca2-3Galβ1-4(Fuca1-3)GlcNAcβ1-3Galβ1-4GlcNAcβ-Sp8                                    | 1446  | 269  |
| 234 | Neu5Aca2-3Galβ1-4GlcNAcβ1-3Galβ1-4(Fuca1-3)GlcNAc-Sp0                                     | 519   | 291  |
| 235 | Neu5Aca2-3Galβ1-4GlcNAcβ1-3Galβ1-4GlcNAcβ1-3Galβ1-4GlcNAcβ-Sp0                            | 966   | 329  |
| 236 | Neu5Aca2-3Galβ1-4GlcNAcβ-Sp0                                                              | 428   | 430  |
| 237 | Neu5Aca2-3Galβ1-4GlcNAcβ-Sp8                                                              | 606   | 458  |
| 238 | Neu5Aca2-3Galβ1-4GlcNAcβ1-3Galβ1-4GlcNAcβ-Sp0                                             | 620   | 734  |
| 239 | Neu5Aca2-3Galβ1-4Glcβ-Sp0                                                                 | 715   | 553  |
| 240 | Neu5Aca2-3Galβ1-4Glcβ-Sp8                                                                 | 270   | 167  |
| 241 | Neu5Aca2-6(Galβ1-3)GalNAcα-Sp8                                                            | 4542  | 2836 |
| 242 | Neu5Aca2-6GalNAcα-Sp8                                                                     | 545   | 601  |
| 243 | Neu5Aca2-6GalNAcβ1-4GlcNAcβ-Sp0                                                           | 388   | 90   |
| 244 | Neu5Aca2-6Galβ1-4[6OSO3]GlcNAcβ-Sp8                                                       | 2798  | 1633 |
| 245 | Neu5Aca2-6Galβ1-4GlcNAcβ-Sp0                                                              | 385   | 289  |
| 246 | Neu5Aca2-6Galβ1-4GlcNAcβ-Sp8                                                              | 353   | 157  |
| 247 | Neu5Aca2-6Galβ1-4GlcNAcβ1-3Galβ1-4(Fuca1-3)GlcNAcβ1-3Galβ1-4(Fuca1-3)GlcNAcβ-Sp0          | 951   | 349  |
| 248 | Neu5Aca2-6Galβ1-4GlcNAcβ1-3Galβ1-4GlcNAcβ-Sp0                                             | 785   | 442  |
| 249 | Neu5Aca2-6Galβ1-4Glcβ-Sp0                                                                 | 601   | 192  |
| 250 | Neu5Aca2-6Galβ1-4Glcβ-Sp8                                                                 | 450   | 352  |
| 251 | Neu5Aca2-6Galβ-Sp8                                                                        | 1147  | 365  |
| 252 | Neu5Aca2-8Neu5Aca-Sp8                                                                     | 615   | 610  |
| 253 | Neu5Aca2-8Neu5Aca2-3Galβ1-4Glcβ-Sp0                                                       | 945   | 529  |
| 254 | Neu5Acβ2-6GalNAcα-Sp8                                                                     | 203   | 212  |
| 255 | Neu5Acβ2-6Galβ1-4GlcNAcβ-Sp8                                                              | 483   | 236  |
| 256 | Neu5Acβ2-6(Galβ1-3)GalNAcα-Sp8                                                            | 2480  | 2916 |
| 257 | Neu5Gca2-3Galβ1-3(Fuca1-4)GlcNAcβ-Sp0                                                     | 437   | 335  |
| 258 | Neu5Gca2-3Galβ1-3GlcNAcβ-Sp0                                                              | 714   | 206  |
| 259 | Neu5Gca2-3Galβ1-4(Fuca1-3)GlcNAcβ-Sp0                                                     | 880   | 582  |
| 260 | Neu5Gca2-3Galβ1-4GlcNAcβ-Sp0                                                              | 647   | 212  |
| 261 | Neu5Gca2-3Galβ1-4Glcβ-Sp0                                                                 | 712   | 253  |
| 262 | Neu5Gca2-6GalNAcα-Sp0                                                                     | 365   | 116  |
| 263 | Neu5Gca2-6Galβ1-4GlcNAcβ-Sp0                                                              | 748   | 200  |
| 264 | Neu5Gca-Sp8                                                                               | 243   | 237  |
| 265 | [3OSO3]Galβ1-4(Fuca1-3)(6OSO3)Glc-Sp0                                                     | 1598  | 452  |
| 266 | [3OSO3]Galβ1-4(Fuca1-3)Glc-Sp0                                                            | 514   | 260  |
| 267 | [3OSO3]Galβ1-4[Fuca1-3][6OSO3]GlcNAc-Sp8                                                  | 1995  | 366  |

|     |                                                       |       |      |
|-----|-------------------------------------------------------|-------|------|
| 268 | [3OSO3]Galβ1-4[Fuca1-3]GlcNAc-Sp0                     | 394   | 303  |
| 269 | Fuca1-2[6OSO3]Galβ1-4GlcNAc-Sp0                       | 1381  | 985  |
| 270 | Fuca1-2Galβ1-4[6OSO3]GlcNAc-Sp8                       | 1305  | 1220 |
| 271 | Fuca1-2[6OSO3]Galβ1-4[6OSO3]Glc-Sp0                   | 2156  | 1083 |
| 272 | Fuca1-2-(6OSO3)-Galβ1-4Glc-Sp0                        | 1701  | 2480 |
| 273 | Fuca1-2-Galβ1-4[6OSO3]Glc-Sp0                         | 1359  | 559  |
| 274 | Galβ1-3(Fuca1-4)GlcNAcβ1-3Galβ1-3(Fuca1-4)GlcNAcβ-Sp0 | 4469  | 2914 |
| 275 | Galβ1-3-(Galβ1-4GlcNAcβ1-6)GalNAc-T                   | 12027 | 8153 |
| 276 | Galβ1-3(GlcNAcβ1-6)GalNAc-T                           | 8636  | 2146 |
| 277 | Galβ1-3-(Neu5Ac2-3Galβ1-4GlcNAcβ1-6)GalNAc-T          | 3835  | 1833 |
| 278 | Galβ1-3GalNAc-T                                       | 10274 | 5772 |
| 279 | Galβ1-3GlcNAcβ1-3Galβ1-3GlcNAcβ-Sp0                   | 160   | 91   |
| 280 | Galβ1-4[Fuca1-3][6OSO3]GlcNAc-Sp0                     | 3319  | 3394 |
| 281 | Galβ1-4[Fuca1-3][6OSO3]Glc-Sp0                        | 2356  | 1641 |
| 282 | Galβ1-4(Fuca1-3)GlcNAcβ1-3Galβ1-3(Fuca1-4)GlcNAcβ-Sp0 | 2981  | 1602 |
| 283 | Galβ1-4GlcNAcβ1-3Galβ1-3GlcNAcβ-Sp0                   | 373   | 213  |
| 284 | Neu5Ac2-3Galβ1-3GlcNAcβ1-3Galβ1-3GlcNAcβ-Sp0          | 472   | 201  |
| 285 | Neu5Ac2-3Galβ1-4GlcNAcβ1-3Galβ1-3GlcNAcβ-Sp0          | 437   | 293  |

---



**Supplementary Table II.** MALDI TOF/TOF mass spectrometry of tryptic fragments of MCF7 cell glycoproteins purified on GalMBP.

| Band Number | SwissProt Accession number | Protein name                                                   | Precursor mass | Protein score | Peptides matched | Sequence Coverage (%) |
|-------------|----------------------------|----------------------------------------------------------------|----------------|---------------|------------------|-----------------------|
| 1           | P19999                     | Mannose-binding protein A (precursor)                          | 25292          | 63            | 9                | 34                    |
| 2           | Q01650                     | Large neutral amino acids transporter small subunit 1 (CD98lc) | 54974          | 111           | 7                | 17                    |
| 3           | P08195                     | 4F2 cell-surface antigen heavy chain (CD98hc)                  | 57909          | 375           | 23               | 47                    |
| 4           | P08195                     | 4F2 cell-surface antigen heavy chain (CD98hc)                  | 57909          | 349           | 22               | 43                    |
| 5           | P08195                     | 4F2 cell-surface antigen heavy chain (CD98hc)                  | 57909          | 204           | 19               | 37                    |
| 6           | P08195                     | 4F2 cell-surface antigen heavy chain (CD98hc)                  | 57909          | 190           | 18               | 38                    |
| 7           | P08195                     | 4F2 cell-surface antigen heavy chain (CD98hc)                  | 57909          | 89            | 14               | 25                    |
| 8           | P08195                     | 4F2 cell-surface antigen heavy chain (CD98hc)                  | 57909          | 58            | 9                | 17                    |

**Supplementary Table III.** Glycoprotein ligands identified by proteomic analysis.

| Cell line | Accession number | Protein                                                                   | Peptides matched | Total Ion Score |
|-----------|------------------|---------------------------------------------------------------------------|------------------|-----------------|
| MCF7      | 4F2_HUMAN        | CD98 heavy chain (CD98hc)                                                 | 18               | 1077            |
|           | LAT1_HUMAN       | CD98 light chain (LAT1)                                                   | 4                | 253             |
|           | CD166_HUMAN      | Activated leukocyte adhesion molecule (ALCAM)                             | 4                | 188             |
| SKBR3     | SUSD2_HUMAN      | Sushi domain-containing protein 2                                         | 6                | 335             |
|           | AAAT_HUMAN       | Neutral amino acid transporter B(0)                                       | 4                | 232             |
|           | LG3BP_HUMAN      | Galectin-3-binding protein precursor (LG3BP)                              | 4                | 171             |
|           | GTR1_HUMAN       | Solute carrier family 2, facilitated glucose transporter member 1 (GLUT1) | 3                | 157             |
|           | SC5A6_HUMAN      | Sodium-dependent multivitamin transporter                                 | 3                | 155             |
|           | 4F2_HUMAN        | CD98 heavy chain (CD98hc)                                                 | 3                | 154             |
|           | AT1A1_HUMAN      | Na/K-transporting ATPase subunit alpha-1                                  | 3                | 130             |
| ZR75-1    | LAMP1_HUMAN      | Lysosome-associated membrane protein-1 (LAMP1)                            | 6                | 293             |
|           | ADT2_HUMAN       | ADP/ATP translocase 2                                                     | 5                | 238             |
|           | ANO1_HUMAN       | Anoctamin-1                                                               | 5                | 180             |
|           | LAMP2_HUMAN      | Lysosome-associated membrane protein-2 (LAMP2)                            | 3                | 175             |
|           | AT1A1_HUMAN      | Na/K-transporting ATPase subunit alpha-1                                  | 3                | 142             |
|           | CD166_HUMAN      | Activated leukocyte adhesion molecule (ALCAM)                             | 3                | 118             |
| T47D      | MUC1_HUMAN       | MUC1                                                                      | 6                | 438             |
|           | LAMP1_HUMAN      | Lysosome-associated membrane protein-1 (LAMP1)                            | 6                | 369             |
|           | LCAP_HUMAN       | Leucyl-cystinyl aminopeptidase                                            | 4                | 269             |
|           | 4F2_HUMAN        | CD98 heavy chain (CD98hc)                                                 | 5                | 261             |
|           | LAMP2_HUMAN      | Lysosome-associated membrane protein-2 (LAMP2)                            | 3                | 168             |
|           | CBPD_HUMAN       | Carboxypeptidase D precursor                                              | 3                | 149             |
|           | FPRP_HUMAN       | Prostaglandin F2 receptor negative regulator precursor                    | 3                | 141             |
